# Supplementary material for: Rhomboid domain containing 1 promotes colorectal cancer growth through activation of the EGFR signalling pathway
Source: PubMed Central journal article supplement (PMC4560765; doi:10.1038/ncomms9022), 2015-08-24
Supplement: ncomms9022-s1.pdf [file ncomms9022-s1.pdf]

## Supplementary information

### Supplementary figures

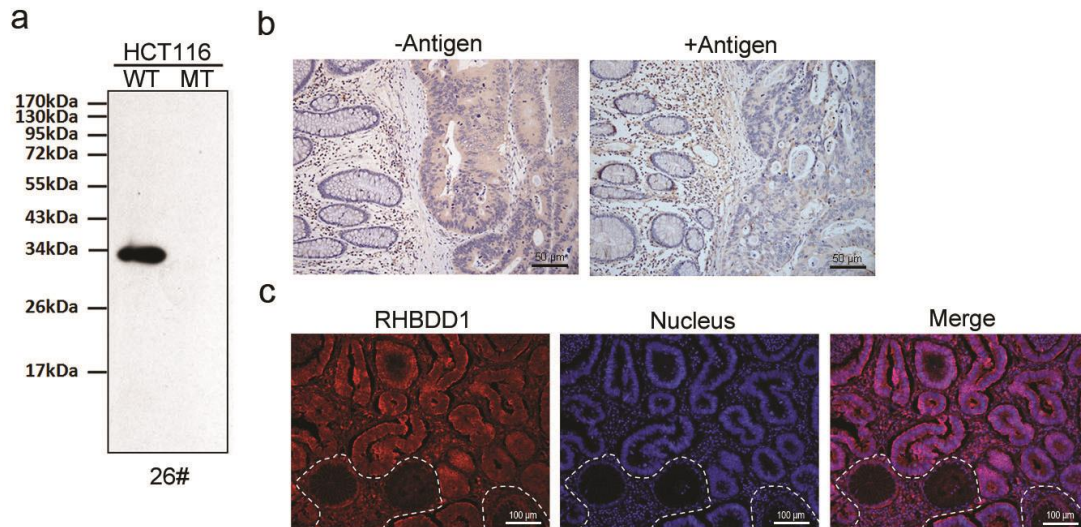

#### Supplementary Figure 1 | Determination of the specificity of in-house anti-RHBDD1 mouse

#### monoclonal antibody. (a) The specificity of the anti-RHBDD1 monoclonal antibody was examined in

wild-type and RHBDD1 mutant HCT116 cells by Western blotting. Antibody dilution: 1:5000. Sample

loading: 20 µg. (b) The specificity of the anti-RHBDD1 monoclonal antibody was examined by

immunohistochemical staining with absorption control. The tissue and the antibody were preincubated

with purified RHBDD1 protein which was used to generate the antibody, and then

immunohistochemical staining was performed according to the standard process. Antibody dilution:

1:200. (scale bar = 50 µm) (c) Immunofluorescence staining for RHBDD1 in paraffin sections of

colorectal carcinoma. RHBDD1 expression was analyzed by immunofluorescence with anti-RHBDD1

monoclonal antibody (red). Cell nuclei were stained with DAPI (blue). Dashed lines represented the

boundary between normal tissue and neoplastic tissue. Antibody dilution: 1:200. (scale bar = 100 µm).

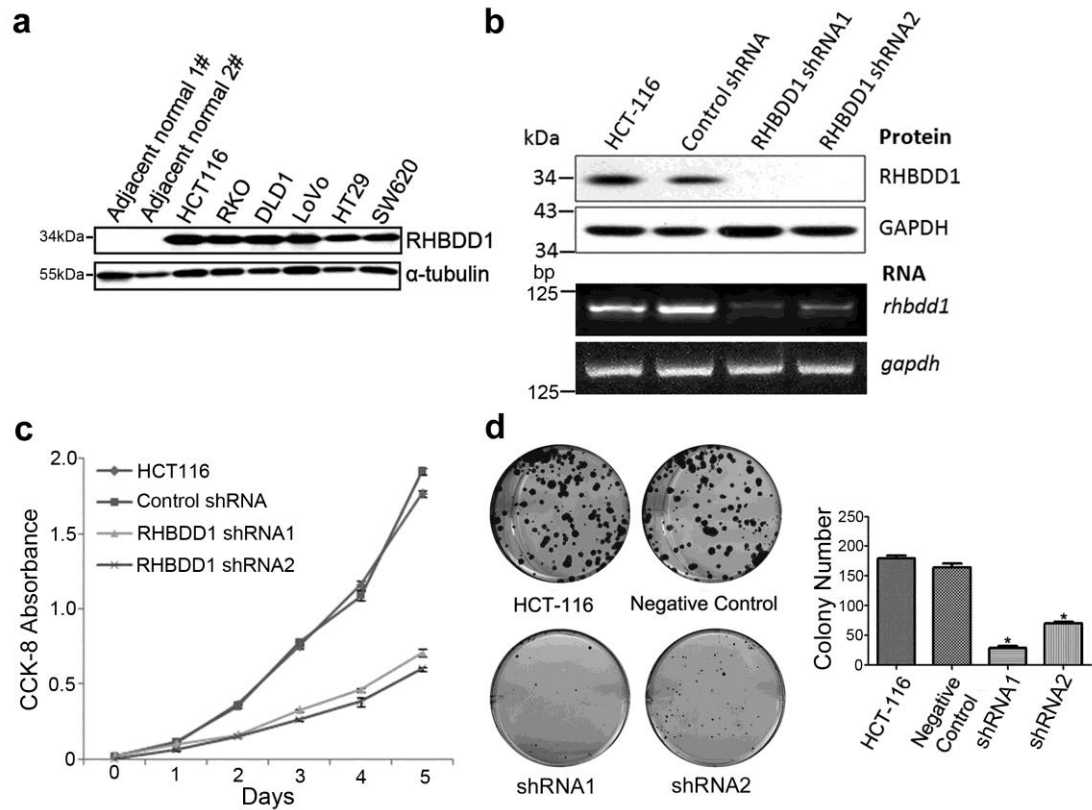

**Supplementary Figure 2 | The effect of RHBDD1 knockdown on tumor cell growth.** (a) The expression level of RHBDD1 in different human colon cancer cell lines was examined by Western blotting.  $\alpha$ -tubulin was used as a loading control. (b) The efficiency of RHBDD1 knockdown in HCT116 cells was examined by Western blotting and RT-PCR. GAPDH was used as a loading control. (c) Cell proliferation assays. The samples were assayed in triplicate. Each point represents the mean value from 3 independent samples. (d) Colony formation assays. Representative photographs and the bar graph were from 3 independent experiments. The data are presented as means  $\pm$  SDs, N = 3, the Student's 2-tailed t-test, \* P < 0.05.

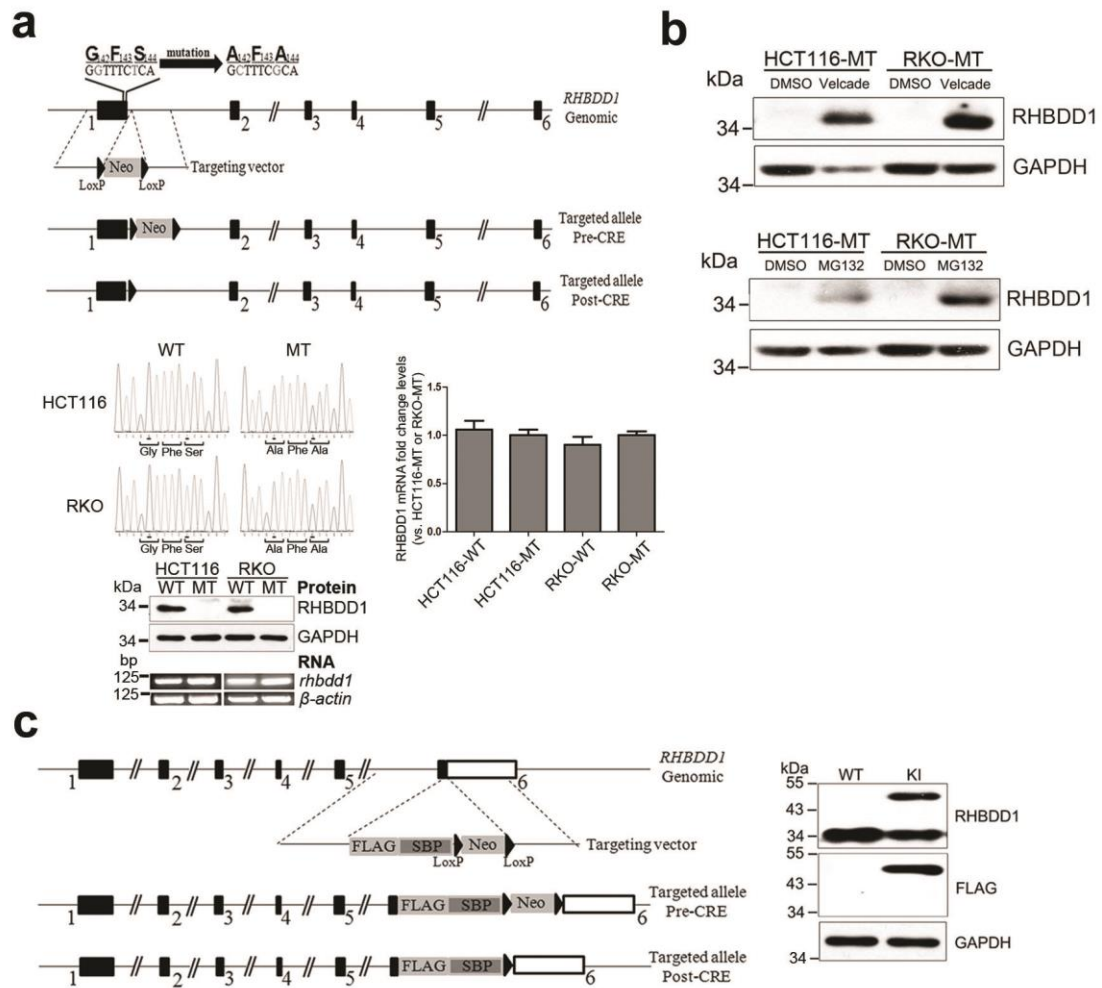

**Supplementary Figure 3** | (a) Diagram of the RHBDD1 targeted mutation strategy. Boxes 1-6 represent the RHBDD1 coding sequences of exons 2-7. The targeting construct consisted of two homologous arms and the neomycin-resistance gene (Neo); the homologous left arm contained the mutations G142A and S144A. The targeted mutation of RHBDD1 in HCT116 and RKO cells with different genotypes was verified by genomic sequencing. The expression of RHBDD1 in HCT116 and RKO cells was examined in by Western blotting and RT-PCR. GAPDH and  $\beta$ -actin were used as loading controls. (b) Targeted mutation of RHBDD1 leads to its degradation through the proteasome pathway. Mutant HCT116 and RKO cells were treated with Velcade or MG132, and RHBDD1 was detected by Western blotting. GAPDH was used as a loading control. (c) Diagram of the RHBDD1 targeted knock-in strategy. Boxes 1-6 represent the RHBDD1 coding sequences of exons 2-7. The

targeting construct consisted of two homologous arms and a Neo-loxP-FLAG-SBP cassette. Homologous recombination resulted in the knock-in of the FLAG and SBP epitopes to the COOH-terminus of the RHBDD1 protein. Expression of wild-type and FLAG-tagged RHBDD1 was examined by Western blotting using anti-RHBDD1 and anti-FLAG antibodies. GAPDH was used as a loading control.

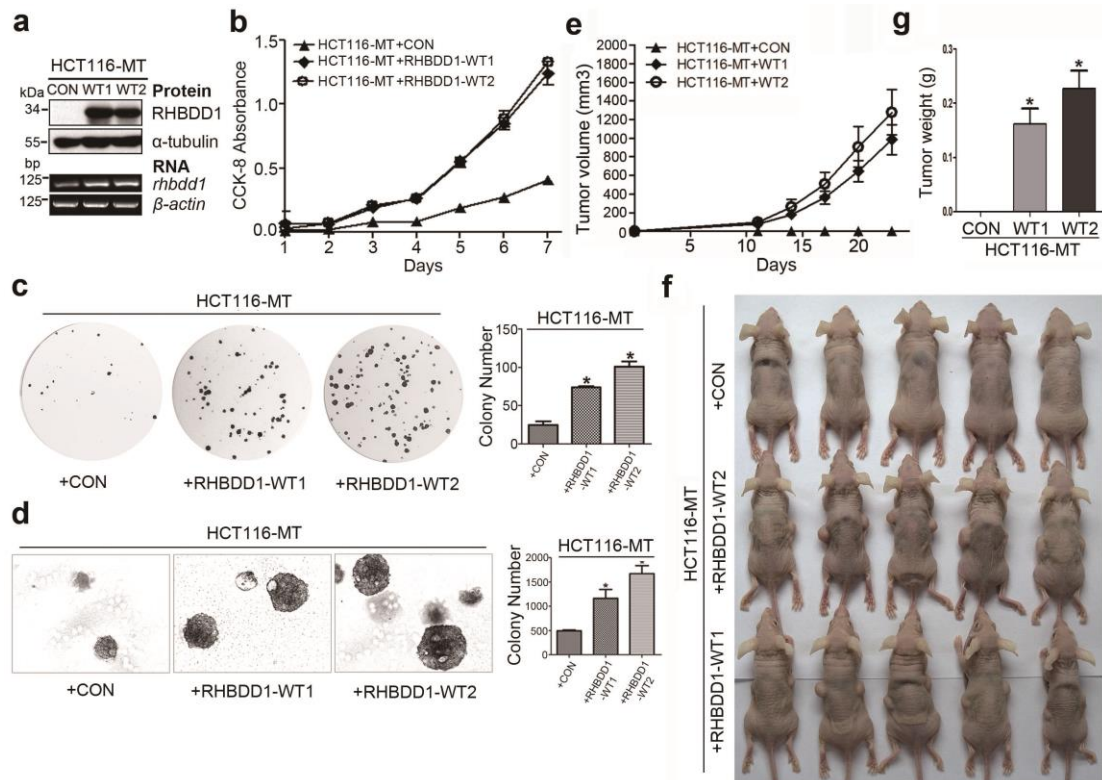

**Supplementary Figure 4 | Tumor cell rescue experiments.** (a) Expression of wild-type RHBDDB1 recombinant proteins in mutant HCT116 cells was examined by Western blotting and RT-PCR.  $\alpha$ -tubulin and  $\beta$ -actin were used as loading controls. (b) Cell proliferation assays. The samples were assayed in triplicate. Each point represents the mean value from three independent samples. (c) Colony formation assays and (d) Soft agar colony formation assays. Representative photographs and bar graphs are from three independent experiments. The data are presented as means  $\pm$  SDs, N = 3, the Student's 2-tailed t-test, \* P < 0.05. (e) Growth curves of xenograft tumors. Tumor volumes were monitored every three days by measuring tumor diameters. The data are presented as means  $\pm$  SDs, N = 10. (f) and (g) Images and weights of xenograft tumors. The tumors were photographed, removed and weighed. The bar graphs represent means  $\pm$  SDs, N = 10, the Student's 2-tailed t-test, \* P < 0.05.

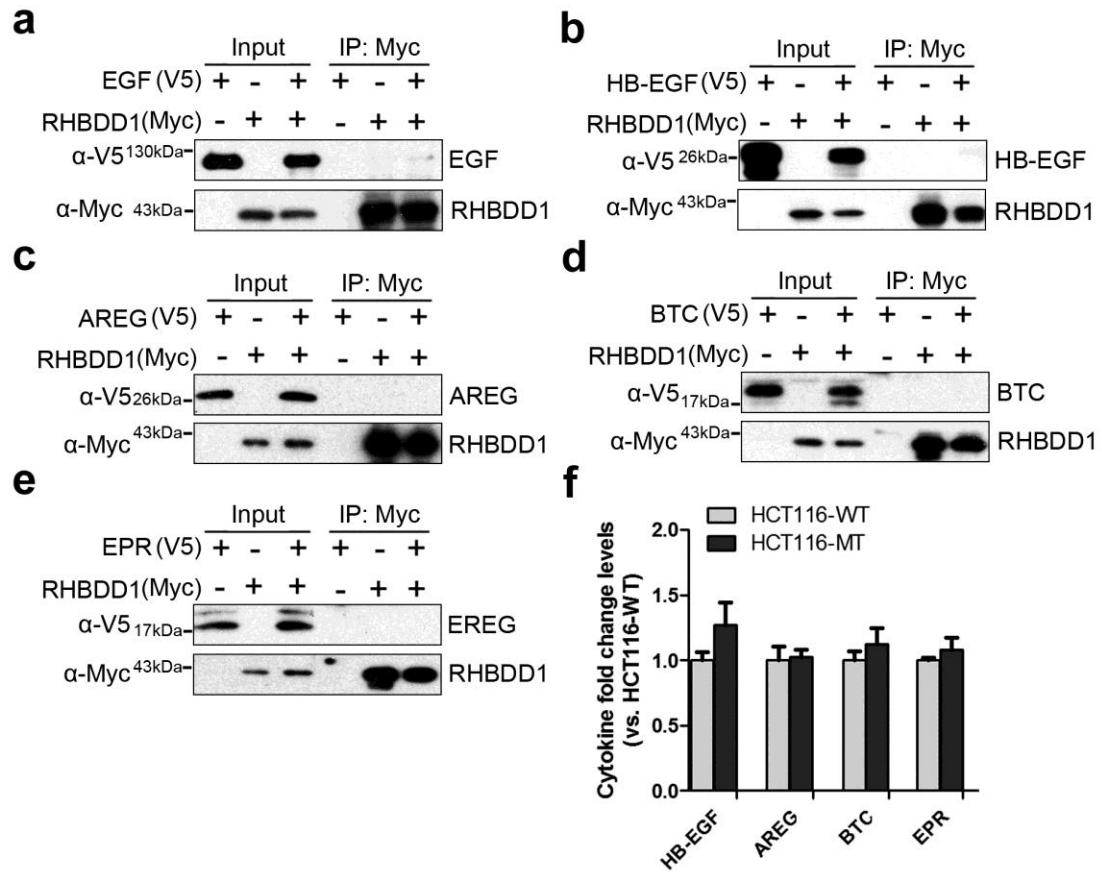

**Supplementary Figure 5 | Determination of substrate specificity of RHBDD1.** (a-e) V5-tagged EGFR ligands (EGF, HB-EGF, AREG, BTC and EPR) were respectively transfected into HEK 293T cells with Myc-tagged RHBDD1. After immunoprecipitation with the anti-Myc antibody, V5-tagged EGFR ligands were detected by Western blotting using the anti-V5 antibody. (f) Media from wild-type or mutant HCT116 cells were collected and assayed for EGF, HB-EGF, AREG, BTC and EPR levels by ELISA, and the relative fold changes were plotted.

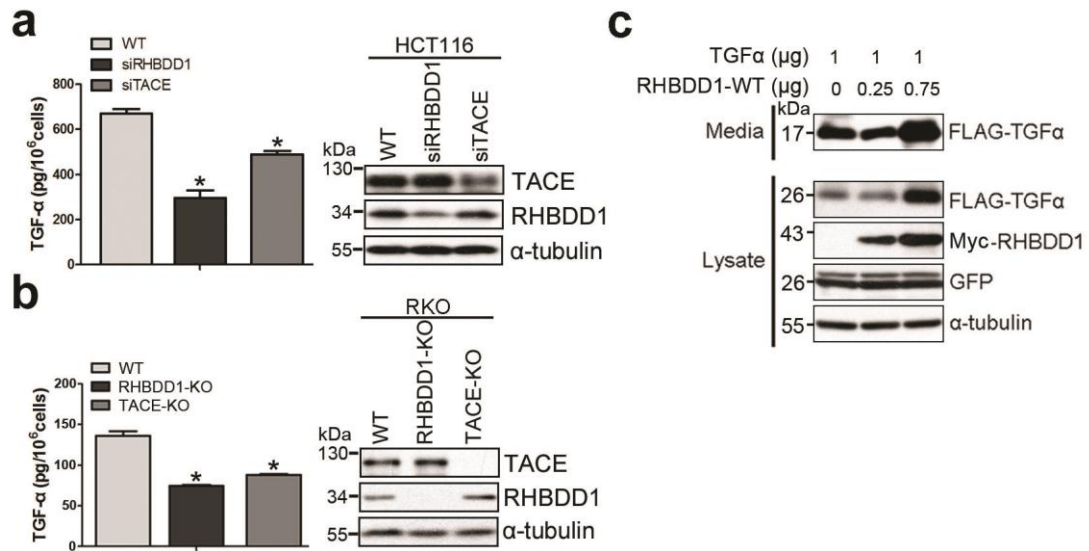

**Supplementary Figure 6 | Comparative effects of RHBDD1 and TACE on TGF $\alpha$  cleavage and**

**secretion.** (a) and (b) Media from wild-type, RHBDD1-KD or TACE-KD HCT116 cells, and from

wild-type, RHBDD1-KO or TACE-KO RKO cells were collected, and TGF $\alpha$  level was measured by

ELISA. The data are presented as picograms per 10<sup>6</sup> cells  $\pm$  SD of three independent experiments, N =

3, the Student's 2-tailed t-test, \* P < 0.05. The expression of RHBDD1 and TACE in HCT116 and

RKO cells was examined in by Western blotting.  $\alpha$ -tubulin was used as a loading control. (c) HEK

293T cells were transfected with TGF $\alpha$ -FLAG (1  $\mu$ g) and RHBDD1-Myc (0, 250 and 750 ng)

constructs, and the secretion assay was performed in the presence of TACE. GFP and  $\alpha$ -tubulin were

used as the transfection and loading controls, respectively.

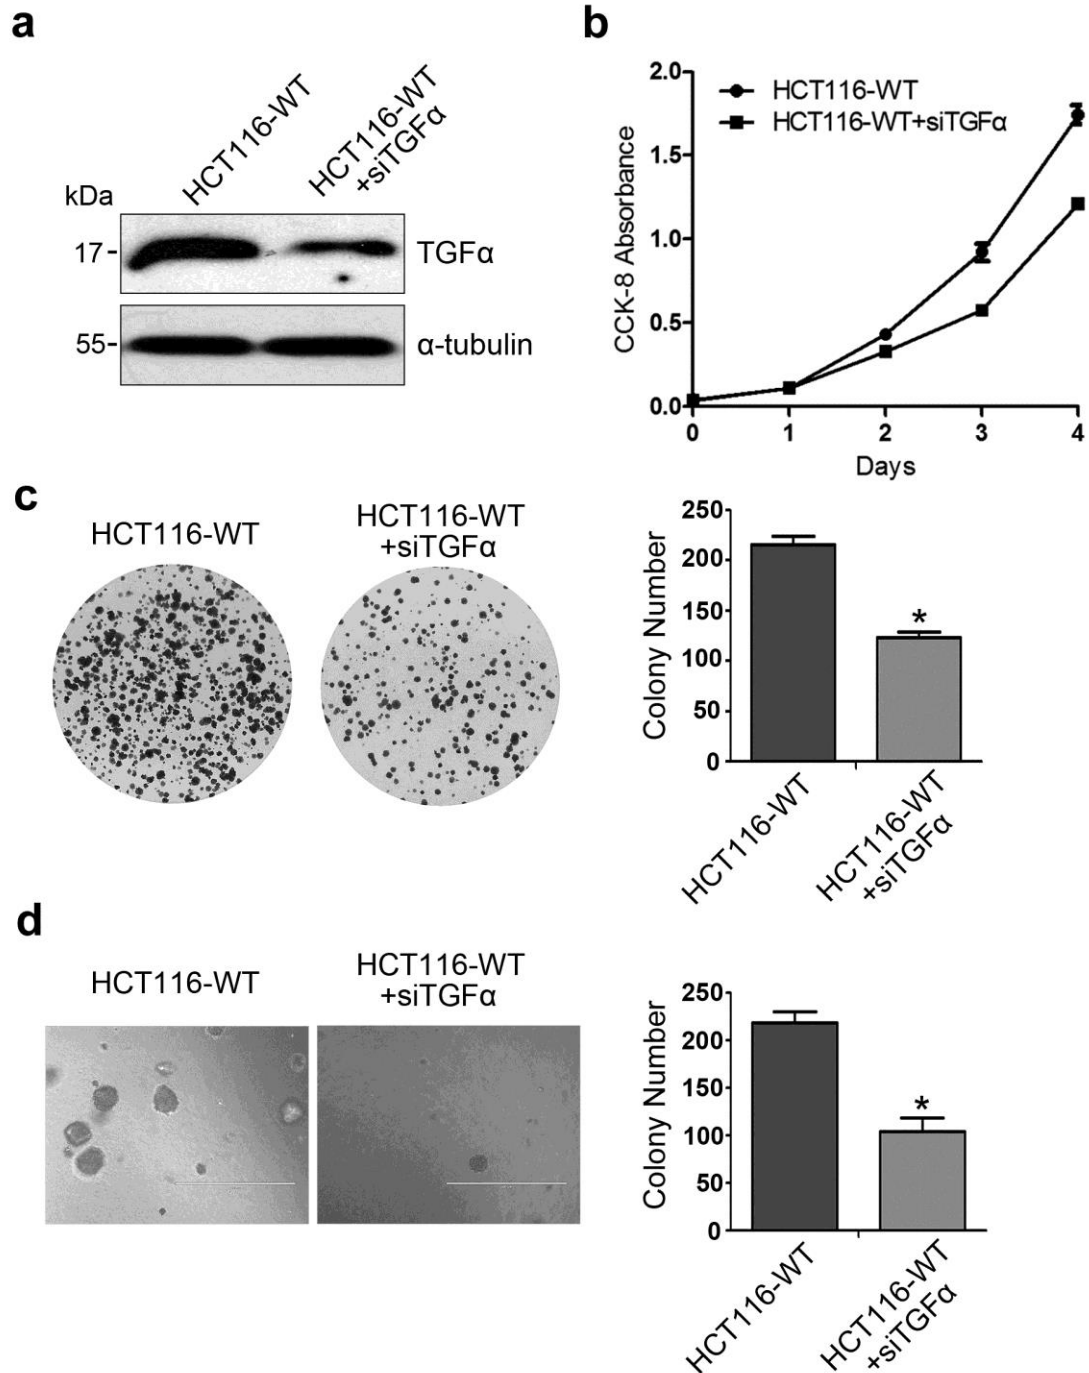

**Supplementary Figure 7 | The effect of TGF $\alpha$  knockdown on tumor cell growth.** (a) The efficiency of TGF $\alpha$  knockdown in HCT116 cells was examined by Western blotting.  $\alpha$ -tubulin was used as a loading control. (b) Cell proliferation assays. The samples were assayed in triplicate. Each point represents the mean value from three independent samples. (c) Colony formation assays. Representative photographs and bar graphs are from three independent experiments. The data are



presented as means  $\pm$  SDs, N = 3, the Student's 2-tailed t-test, \* P < 0.05. **(d)** Soft agar colony formation assays. Representative photographs and bar graphs are from three independent experiments.

The data are presented as means  $\pm$  SDs, N = 3, the Student's 2-tailed t-test, \* P < 0.05.

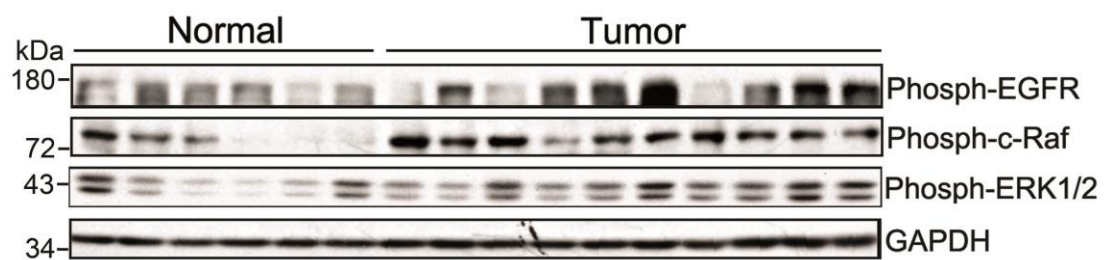

**Supplementary Figure 8** | The phosphorylation levels of EGFR, c-Raf and ERK1/2 were examined in normal tissues and tumors from a murine model of colitis-associated colorectal cancer by Western blotting using the indicated antibodies. GAPDH was used as a loading control.

Fig. 1c

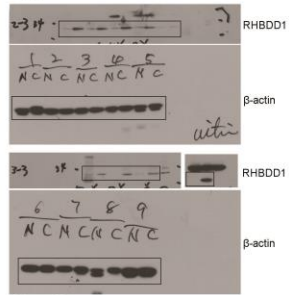

Fig. 3e

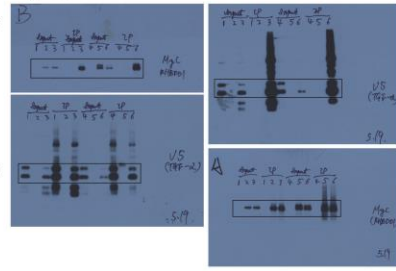

Fig. 3f

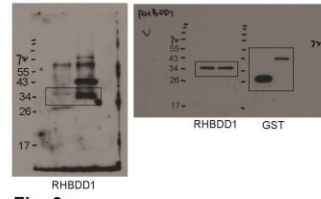

Fig. 3g

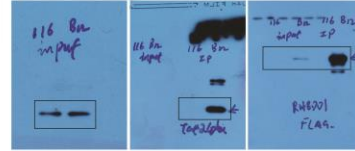

Fig. 4b

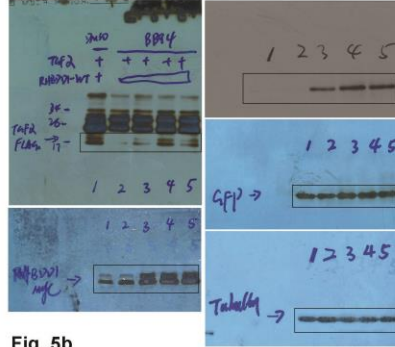

Fig. 4c

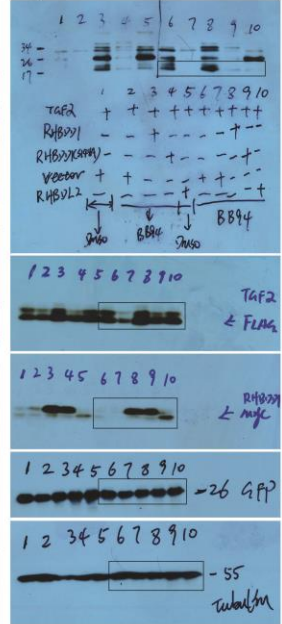

Fig. 4f

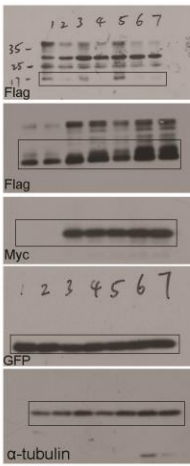

Fig. 5a

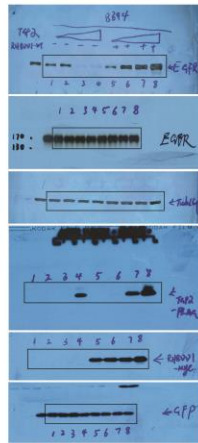

Fig. 5b

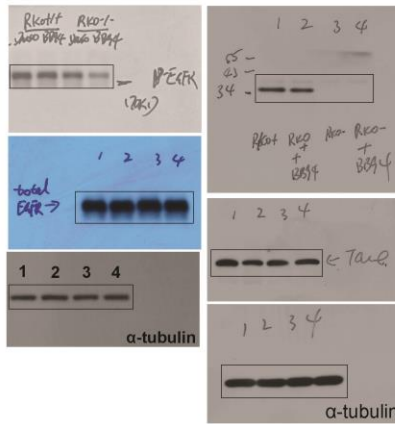

Supplementary Figure 9 | Uncropped scans for the main western blotting are shown above.

## Supplementary tables

**Supplementary Table 1.** Characteristics of 142 patients with colorectal cancer included in the study.

| Characteristics                     | No. of patients<br>(N=142) |
|-------------------------------------|----------------------------|
| Gender (male/female)                | 80/62                      |
| Age, y ( $\leq 60$ / $> 60$ )       | 60/82                      |
| Tumor size, cm ( $\leq 5$ / $> 5$ ) | 54/88                      |
| Differentiation degree              |                            |
| Low                                 | 18                         |
| Moderate                            | 107                        |
| High                                | 17                         |
| Stage                               |                            |
| I                                   | 19                         |
| II                                  | 55                         |
| III                                 | 57                         |
| IV                                  | 11                         |
| Lymph node metastasis               |                            |
| Positive                            | 63                         |
| Negative                            | 79                         |

**Supplementary Table 2.** Mass spectrometry analysis of RHBDD1 interacting proteins.

| No. | Accession | Description                                     | Gene ID | Score | MW [kDa] |
|-----|-----------|-------------------------------------------------|---------|-------|----------|
| 1   | P01135    | Protransforming growth factor alpha             | 7039    | 50.30 | 16.99    |
| 2   | P68104    | Elongation factor 1-alpha 1                     | 1915    | 20.18 | 50.11    |
| 3   | Q71U36    | Tubulin alpha-1A chain                          | 7846    | 10.21 | 50.10    |
| 4   | O75340    | Programmed cell death protein 6                 | 10016   | 10.19 | 21.85    |
| 5   | P49411    | Elongation factor Tu, mitochondrial             | 7284    | 10.17 | 49.51    |
| 6   | Q9UPN3    | Microtubule-actin cross-linking factor 1        | 23499   | 10.17 | 62.00    |
| 7   | O14744    | Protein arginine N-methyltransferase 5          | 10419   | 10.16 | 72.64    |
| 8   | O00483    | NADH dehydrogenase 1 alpha subcomplex subunit 4 | 4697    | 10.15 | 9.36     |
| 9   | Q9Y4H4    | G-protein-signaling modulator 3                 | 63940   | 10.14 | 17.85    |

**Supplementary Table 3.** Oligonucleotide sequences used for improved somatic cell knock-in strategy, gene knockdown strategy, reverse-transcription PCR and real-time PCR.

| <b>Targeted knock-in of mutation in RHBDD1</b>     |                                   |                                  |                                  |
|----------------------------------------------------|-----------------------------------|----------------------------------|----------------------------------|
| <b>No.</b>                                         | <b>Primer name</b>                | <b>Forward (5' to 3')</b>        | <b>Backward (5' to 3')</b>       |
| 1                                                  | Left arm                          | TGACCAGCTAGCAGATAATGTATGCTCGTGTC | CAACTAGTAAAATGACAGCAGCCACACC     |
| 2                                                  | Right arm                         | CAATCGATATGAAGTGTGGGTCCCTATC     | TGACCAGTCGACAAAATTAGCTGGGCATGGTG |
| 3                                                  | Screening                         | CTGGCAGTGTGGAAATTGG              | AGGTGGGTGAATCACAAGGT             |
| 4                                                  | Cre                               | TTGCTGTTGCCGAATTTATG             | CCTCCTCTTCAAGACGCAA              |
| 5                                                  | Mutation identification           | ATGCAACGGAGATCAAGAGG             | TCCAGGGCAATAATGGTTGT             |
| <b>Targeted knock-in of epitopes in RHBDD1</b>     |                                   |                                  |                                  |
| <b>No.</b>                                         | <b>Primer name</b>                | <b>Forward (5' to 3')</b>        | <b>Backward (5' to 3')</b>       |
| 1                                                  | Left arm                          | CAACTAGTAGGAGAGAACAGAGTGGT       | CAACTAGTCTGGCTATCGAATCTGTGAA     |
| 2                                                  | Right arm                         | TGACCAAGCTTGGTGGCATCTTGGGAAGACA  | TGACCAAGCTTCGACTCAGACAGACAATCTG  |
| 3                                                  | Screening                         | GCAGGTGCTGTTGAGTCAAGT            | TCATGGAACACAAGCACCAG             |
| 4                                                  | Cre                               | CACCCTACGGGTTTCATCTC             | GAGCGATCTGGAGCAATACC             |
| <b>Gene knockdown</b>                              |                                   |                                  |                                  |
| <b>No.</b>                                         | <b>Gene</b>                       | <b>siRNA 1#</b>                  | <b>siRNA 2#</b>                  |
| 1                                                  | RHBDD1                            | GUAGAUGGUUUGCCUAUGUTT            | GGAUUCUUGUUGGACUAAUTT            |
| 2                                                  | TACE                              | CAAAGAGACAGAGTGCTAGT             | GAGAAGCTTGATTCTTTGC              |
| 3                                                  | TGF $\alpha$                      | AACACUGUGAGUGGUGCCG              | GAAGCAGGCCAUCACCGCCT             |
| <b>Reverse-transcription PCR and real-time PCR</b> |                                   |                                  |                                  |
| <b>No.</b>                                         | <b>Gene</b>                       | <b>Forward (5' to 3')</b>        | <b>Backward (5' to 3')</b>       |
| 1                                                  | <i>rhbdd1</i>                     | CTCTGGGACCGAGGAAATACC            | ACCTCACTGGCTATCGAATCTGT          |
| 2                                                  | <i><math>\beta</math>-catenin</i> | ACTGGCCTCTGATAAAGGCAACT          | TAGTCGTGGAATAGCACCCCTGTT         |

|   |                                 |                          |                         |
|---|---------------------------------|--------------------------|-------------------------|
| 3 | <i><math>\beta</math>-actin</i> | AGGCCAACCGCGAGAAGAT      | TCACCGGAGTCCATCACGAT    |
| 4 | <i>gapdh</i>                    | TCAACGACCACTTTGTCAAGCTCA | GCTGGTGGTCCAGGGGTCTTACT |
